# Supplementary material for: Association of uric acid with the decline in estimated glomerular filtration rate in middle-aged and elderly populations: evidence based on the China Health and Retirement Longitudinal Study
Source: HighWire-hosted journal article supplement (doi:10.1136/bmjopen-2023-071771), 2023-05-01
Supplement: bmjopen-2023-071771supp001_data_supplement.pdf [file bmjopen-2023-071771supp001_data_supplement.pdf]

**Association of uric acid with the decline in estimated glomerular filtration rate in middle-aged and elderly populations: evidence based on the China Health and Retirement Longitudinal Study**

**Supplemental Table 1. Baseline characteristics of participants included and excluded in the study**

| Characteristics                             | participants included                      |                                                       |                                             | P-value |
|---------------------------------------------|--------------------------------------------|-------------------------------------------------------|---------------------------------------------|---------|
|                                             | participants included in baseline (n=7769) | in the baseline and excluded after follow-up (n=3231) | participants included in the study (n=4538) |         |
| <b>Demographic and biomarker indicators</b> |                                            |                                                       |                                             |         |
| Age (years)                                 | 58 (52~65)                                 | 58 (52~66)                                            | 58 (52~64)                                  | 0.51    |
| 45~59                                       | 4370 (56.2)                                | 1,797 (55.6)                                          | 2,573 (56.7)                                | 0.34    |
| 60~                                         | 3399 (43.8)                                | 1,434 (44.4)                                          | 1,965 (43.3)                                |         |
| Female [n (%)]                              | 4170 (53.7)                                | 1676 (51.9)                                           | 2494 (55.0)                                 | <0.01   |
| Married with spouse [n (%)]                 | 6490 (83.5)                                | 2626 (81.3)                                           | 3864 (85.2)                                 | <0.001  |
| Education                                   |                                            |                                                       |                                             |         |
| Middle school and below [n (%)]             | 5471 (70.4)                                | 2248 (69.6)                                           | 3223 (71.0)                                 | 0.17    |
| High school and above [n (%)]               | 2298 (29.6)                                | 983 (30.4)                                            | 1315 (29.0)                                 |         |
| Ever drink [n (%)]                          | 3032 (39.0)                                | 1272 (39.4)                                           | 1760 (38.8)                                 | 0.60    |
| Ever smoke [n (%)]                          | 3010 (38.7)                                | 1309 (40.5)                                           | 1701 (37.5)                                 | <0.01   |
| Rural region [n (%)]                        | 5021 (64.6)                                | 2009 (62.2)                                           | 3012 (66.4)                                 | <0.001  |
| Height (m)                                  | 1.58 (1.52~1.64)                           | 1.58 (1.52~1.64)                                      | 1.58 (1.52~1.64)                            | 0.72    |
| Weight (kg)                                 | 57.8 (51.0~65.7)                           | 57.3 (50.3~65.2)                                      | 58.2 (51.4~65.9)                            | <0.01   |
| Waist (cm)                                  | 84.9 (78.0~92.0)                           | 84.0 (77.4~91.2)                                      | 85.0 (78.6~92.3)                            | <0.01   |
| Body mass index (kg/m <sup>2</sup> )        | 23.1 (20.9~25.8)                           | 22.9 (20.6~25.6)                                      | 23.3 (21.1~25.9)                            | <0.001  |
| HGS (kg)                                    | 31.0 (25.0~39.0)                           | 30.5 (24.5~39.0)                                      | 31.0 (25.0~39.0)                            | 0.74    |
| HGS group [n (%)]                           |                                            |                                                       |                                             |         |
| The low quarter of HGS                      | 1955 (25.2)                                | 882 (27.3)                                            | 1073 (23.6)                                 | <0.001  |
| The upper three quarters of HGS             | 5814 (74.8)                                | 2349 (72.7)                                           | 3465 (76.4)                                 |         |
| Systolic blood pressure (mmHg)              | 126 (114~141)                              | 127 (115~141)                                         | 126 (114~141)                               | 0.19    |
| Diastolic blood pressure (mmHg)             | 75 (67~83)                                 | 75 (67~83)                                            | 74 (67~83)                                  | 0.36    |
| <b>Blood examination</b>                    |                                            |                                                       |                                             |         |
| WBCs (×10 <sup>9</sup> /L)                  | 5.9 (5.0~7.2)                              | 6.0 (5.0~7.3)                                         | 5.9 (5.0~7.2)                               | 0.08    |
| Hemoglobin (mg/dL)                          | 14.2 (13.1~15.5)                           | 14.2 (13.0~15.5)                                      | 14.3 (13.1~15.5)                            | 0.82    |
| Platelet (×10 <sup>9</sup> /L)              | 207 (163~254)                              | 204 (160~251)                                         | 209 (164~257)                               | <0.01   |
| Blood urea nitrogen (mg/dL)                 | 15.0 (12.5~18.0)                           | 15.0 (12.5~18.0)                                      | 14.9 (12.5~17.9)                            | 0.23    |
| Fasting glucose (mg/dL)                     | 101.7 (94.5~110.2)                         | 101.5 (94.3~110.5)                                    | 101.9 (94.9~109.8)                          | 0.20    |
| GHbA1c (%)                                  | 5.1 (4.9~5.4)                              | 5.1 (4.9~5.4)                                         | 5.1 (4.9~5.4)                               | 0.89    |
| Total cholesterol (mg/dL)                   | 191.0 (168.6~215.3)                        | 191.0 (168.6~214.9)                                   | 191.6 (168.6~215.7)                         | 0.35    |
| Triglyceride (mg/dL)                        | 102.7 (74.3~145.1)                         | 101.8 (74.3~144.3)                                    | 103.5 (74.3~146.0)                          | 0.36    |
| HDL cholesterol (mg/dL)                     | 49.5 (40.6~59.9)                           | 50.0 (41.0~60.3)                                      | 49.1 (40.6~59.5)                            | 0.12    |
| LDL cholesterol (mg/dL)                     | 115.2 (94.3~138.0)                         | 115.2 (94.7~138.0)                                    | 115.6 (94.3~138.0)                          | 0.71    |
| hs-CRP (mg/L)                               | 0.94 (0.55~1.74)                           | 0.95 (0.56~1.75)                                      | 0.92 (0.54~1.73)                            | 0.24    |
| Uric acid (mg/dL)                           | 4.3 (3.6~5.1)                              | 4.4 (3.6~5.2)                                         | 4.2 (3.5~5.0)                               | <0.001  |
| Q1                                          | 1937 (24.9)                                | 733 (22.7)                                            | 1204 (26.5)                                 | <0.001  |
| Q2                                          | 1941 (25.0)                                | 764 (23.6)                                            | 1177 (26.0)                                 |         |

|                                                     |                   |                   |                   |        |
|-----------------------------------------------------|-------------------|-------------------|-------------------|--------|
| Q3                                                  | 1947 (25.1)       | 862 (26.7)        | 1085 (23.9)       |        |
| Q4                                                  | 1944 (25.0)       | 872 (27.0)        | 1072 (23.6)       |        |
| eGFR (mL/min/1.73m <sup>2</sup> )                   | 95.0 (85.1~102.5) | 93.8 (83.5~102.0) | 95.9 (86.3~102.7) | <0.001 |
| 60~89 mL/min/1.73m <sup>2</sup>                     | 2780 (35.8)       | 1272 (39.4)       | 1,508 (33.2)      | <0.001 |
| 90~ mL/min/1.73m <sup>2</sup>                       | 4989 (64.2)       | 1959 (60.6)       | 3,030 (66.8)      |        |
| <b>Disease states and corresponding medications</b> |                   |                   |                   |        |
| Hypertension [ <i>n</i> (%)]                        | 3180 (40.9)       | 1303 (40.3)       | 1877 (41.4)       | 0.36   |
| Antihypertensive therapy [ <i>n</i> (%)]            | 1470 (18.9)       | 606 (18.8)        | 864 (19.0)        | 0.75   |
| Diabetes mellitus [ <i>n</i> (%)]                   | 1256 (16.2)       | 540 (16.7)        | 716 (15.8)        | 0.27   |
| Hypoglycemic therapy [ <i>n</i> (%)]                | 267 (3.4)         | 114 (3.6)         | 153 (3.4)         | 0.74   |
| Heart disease [ <i>n</i> (%)]                       | 892 (11.5)        | 358 (11.1)        | 534 (11.8)        | 0.35   |
| Therapy for heart disease [ <i>n</i> (%)]           | 543 (7.0)         | 220 (6.8)         | 323 (7.1)         | 0.60   |
| Dyslipidemia [ <i>n</i> (%)]                        | 4702 (60.5)       | 1920 (59.4)       | 2782 (61.3)       | 0.10   |
| Therapy for dyslipidemia [ <i>n</i> (%)]            | 363 (4.7)         | 114 (3.5)         | 249 (5.5)         | <0.001 |
| Rheumatism [ <i>n</i> (%)]                          | 2653 (34.2)       | 1105 (34.2)       | 1548 (34.1)       | 0.94   |
| Therapy for rheumatism [ <i>n</i> (%)]              | 1021 (13.1)       | 399 (12.4)        | 622 (13.7)        | 0.08   |

Data are *n* (%) or median (interquartile range); HGS: handgrip strength; WBCs: white blood cell; GHbA1c: glycosylated hemoglobin A1c; HDL: high-density lipoprotein; LDL: low-density lipoprotein; hs-CRP: high-sensitivity C-reactive protein; eGFR: estimated glomerular filtration rate.

The Mann-Whitney U test was for continuous variables and  $\chi^2$  test was for categorical variables between Group 1 and Group 2 respectively.

**Supplemental Table 2. Univariate analysis of variables between eGFR decline group and non-eGFR decline group**

| Variables                                   | Coef.  | 95% Conf. Interval | <i>P</i> -value |
|---------------------------------------------|--------|--------------------|-----------------|
| <b>Demographic and biomarker indicators</b> |        |                    |                 |
| Age (years)                                 |        |                    |                 |
| 45~59                                       | ref    |                    |                 |
| 60~                                         | 0.808  | 0.659 to 0.957     | <0.001          |
| Sex                                         |        |                    |                 |
| Female                                      | ref    |                    |                 |
| Male                                        | 0.200  | 0.053 to 0.347     | 0.01            |
| Married with spouse [ <i>n</i> (%)]         | 0.298  | 0.103 to 0.493     | <0.01           |
| Education                                   |        |                    |                 |
| Middle school and below [ <i>n</i> (%)]     | ref    |                    |                 |
| High school and above [ <i>n</i> (%)]       | -0.185 | -0.351 to -0.019   | 0.03            |
| Ever drink [ <i>n</i> (%)]                  | 0.058  | -0.093 to 0.208    | 0.45            |
| Ever smoke [ <i>n</i> (%)]                  | 0.156  | 0.006 to 0.306     | 0.04            |
| Rural region [ <i>n</i> (%)]                | 0.144  | -0.014 to 0.302    | 0.07            |
| Height (m)                                  | -0.198 | -1.083 to 0.688    | 0.66            |
| Weight (kg)                                 | -0.011 | -0.018 to -0.004   | <0.01           |
| Waist (cm)                                  | -0.005 | -0.013 to 0.002    | 0.19            |
| Body mass index (kg/m <sup>2</sup> )        | -0.036 | -0.056 to -0.015   | <0.01           |
| HGS group                                   |        |                    |                 |

|                                                     |        |                  |        |
|-----------------------------------------------------|--------|------------------|--------|
| The low quarter of HGS                              | ref    |                  |        |
| The upper three quarters of HGS                     | -0.143 | -0.308 to 0.022  | 0.09   |
| Systolic blood pressure (mmHg)                      | 0.008  | 0.005 to 0.012   | <0.001 |
| Diastolic blood pressure (mmHg)                     | 0.001  | -0.006 to 0.007  | 0.88   |
| <b>Blood examinations</b>                           |        |                  |        |
| WBC ( $10^9/L$ )                                    | 0.014  | -0.027 to 0.055  | 0.51   |
| Hemoglobin (mg/dL)                                  | -0.062 | -0.099 to -0.024 | <0.01  |
| Platelet ( $10^9/L$ )                               | -0.001 | -0.002 to 0.001  | 0.11   |
| Blood urea nitrogen (mg/dL)                         | 0.012  | -0.005 to 0.030  | 0.16   |
| Fasting glucose (mg/dL)                             | -0.004 | -0.009 to 0.001  | 0.10   |
| GHbA1c (%)                                          | 0.018  | -0.151 to 0.187  | 0.83   |
| eGFR group (mL/min/1.73m <sup>2</sup> )             |        |                  |        |
| 60~89                                               | ref    |                  |        |
| 90~                                                 | 1.046  | 0.859 to 1.233   | <0.001 |
| Total cholesterol (mg/dL)                           | -0.002 | -0.004 to -0.001 | 0.04   |
| Triglyceride (mg/dL)                                | -0.001 | -0.002 to -0.001 | 0.03   |
| HDL cholesterol (mg/dL)                             | -0.001 | -0.005 to 0.004  | 0.84   |
| LDL cholesterol (mg/dL)                             | -0.002 | -0.004 to 0.001  | 0.08   |
| hs-CRP (mg/L)                                       | 0.037  | -0.019 to 0.093  | 0.20   |
| Uric acid (mg/dL)                                   | 0.046  | -0.015 to 0.108  | 0.14   |
| Uric acid group                                     |        |                  |        |
| Q1                                                  | ref    |                  |        |
| Q2                                                  | 0.280  | 0.067 to 0.494   | 0.01   |
| Q3                                                  | 0.309  | 0.096 to 0.523   | <0.01  |
| Q4                                                  | 0.281  | 0.068 to 0.495   | 0.01   |
| <b>Disease states and corresponding medications</b> |        |                  |        |
| Hypertension [ <i>n</i> (%)]                        | 0.325  | 0.178 to 0.473   | <0.001 |
| Antihypertensive therapy [ <i>n</i> (%)]            | 0.298  | 0.120 to 0.476   | <0.01  |
| Diabetes mellitus [ <i>n</i> (%)]                   | -0.060 | -0.264 to 0.144  | 0.56   |
| Hypoglycemic therapy [ <i>n</i> (%)]                | 0.007  | -0.399 to 0.413  | 0.97   |
| Heart disease [ <i>n</i> (%)]                       | 0.091  | -0.132 to 0.314  | 0.43   |
| Therapy for heart disease [ <i>n</i> (%)]           | 0.259  | -0.137 to 0.527  | 0.06   |
| Dyslipidemia [ <i>n</i> (%)]                        | 0.264  | -0.038 to 0.566  | 0.09   |
| Therapy for dyslipidemia [ <i>n</i> (%)]            | -0.080 | -0.230 to 0.07   | 0.30   |
| Rheumatism [ <i>n</i> (%)]                          | 0.057  | -0.097 to 0.211  | 0.47   |
| Therapy for rheumatism [ <i>n</i> (%)]              | 0.168  | -0.038 to 0.374  | 0.11   |

HGS: handgrip strength; WBC: white blood cell; GHbA1c: glycosylated hemoglobin A1c; eGFR: estimated glomerular filtration rate; HDL: high density lipoprotein; LDL: low density lipoprotein; hs-CRP: high-sensitivity C-reactive protein.

The hand grip strength was grouped according to the interquartile range by sex. The lower quarter of the grip strength was group 1, and the upper three quarters were group 2. Serum uric acid is divided into Q1, Q2, Q3 and Q4 groups by one-quarter percentile.
